# Supplementary material for: Evaluating the Implementation of Integrated Mental Health Care: A Systematic Review to Guide the Development of Quality Measures
Source: Atypon-hosted journal article supplement (doi:10.1176/appi.ps.201600464), 2017-05-15
Supplement: appi.ps.201600464.ds001.pdf [file appi.ps.201600464.ds001.pdf]

 


Psychiatry Online
